# Supplementary material for: Toward reducing biomaterial antigenic potential: a miniaturized Fc-binding domain for local deposition of antibodies
Source: Royal Society of Chemistry journal article supplement (doi:10.1039/c8bm01220b), 2018-12-21
Supplement: c8bm01220b1.pdf [file c8bm01220b1.pdf]

**Figure S1a**

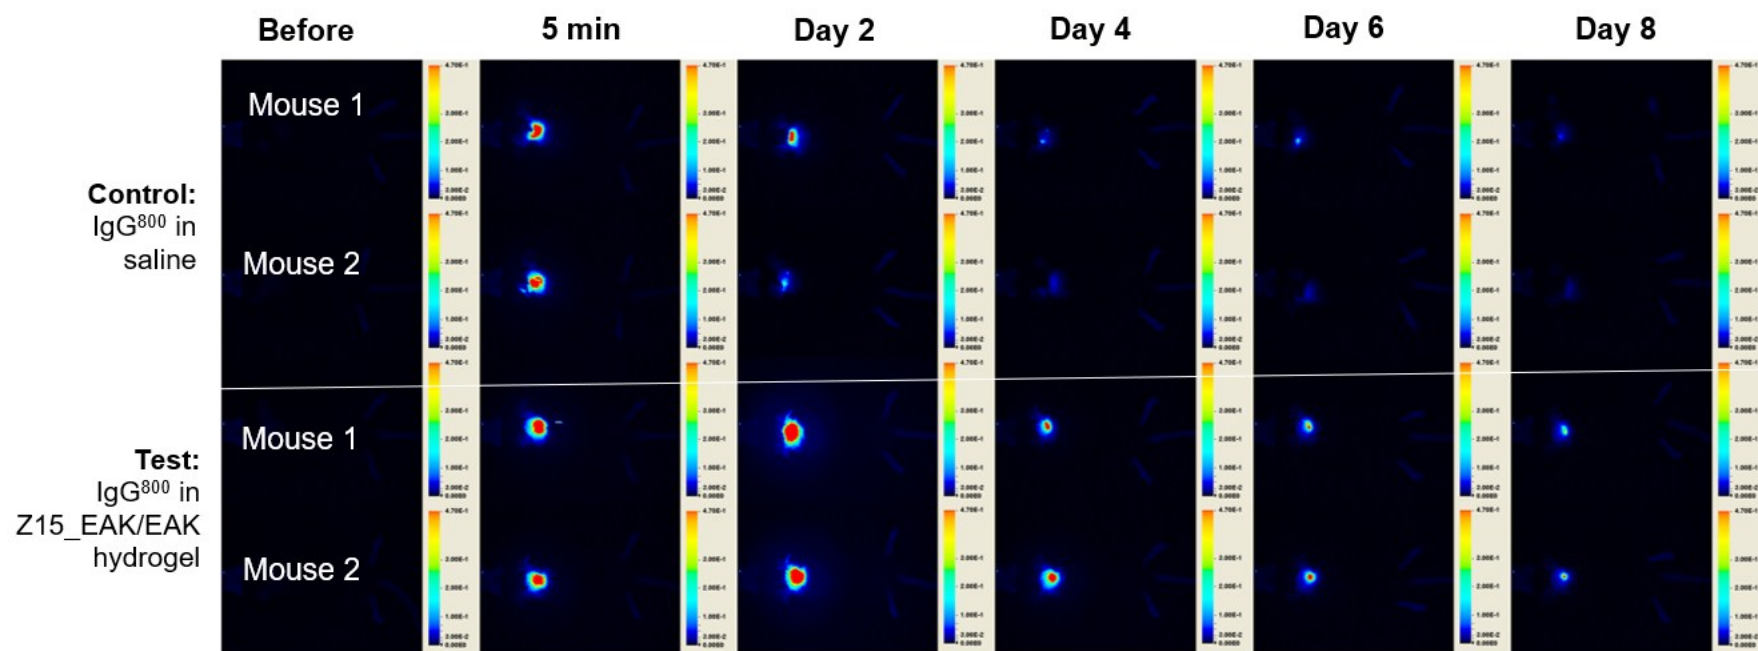

**Figure S1b**

**Control: EAK gel**

**Z15\_EAK/EAK gel**

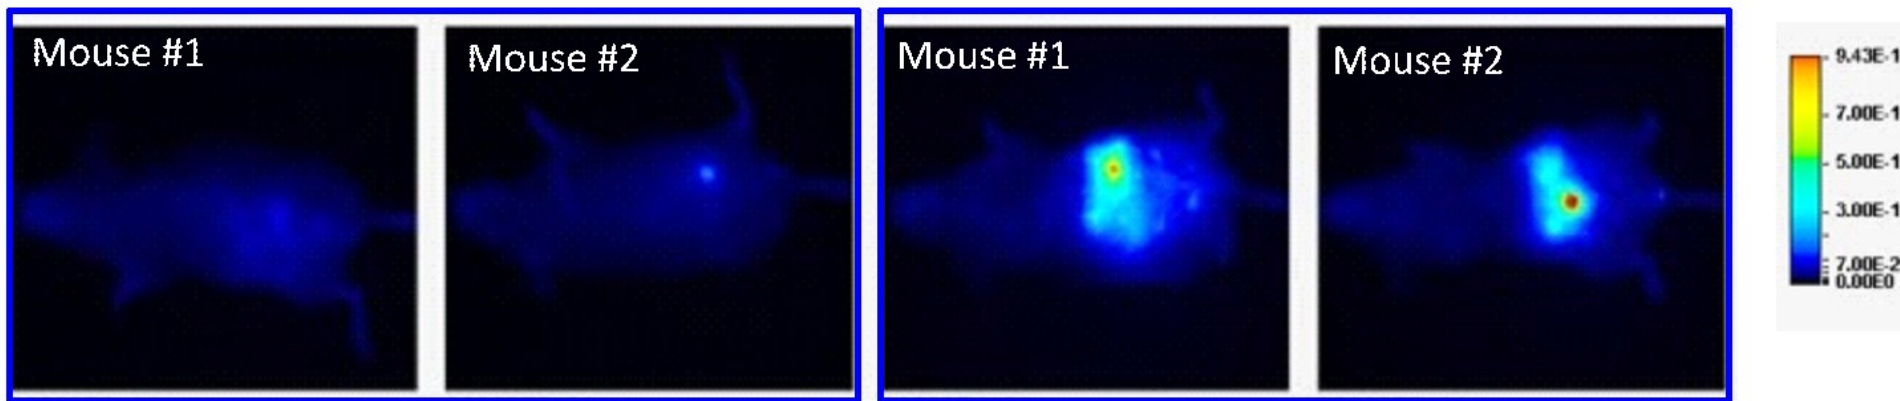

## Figure S1c

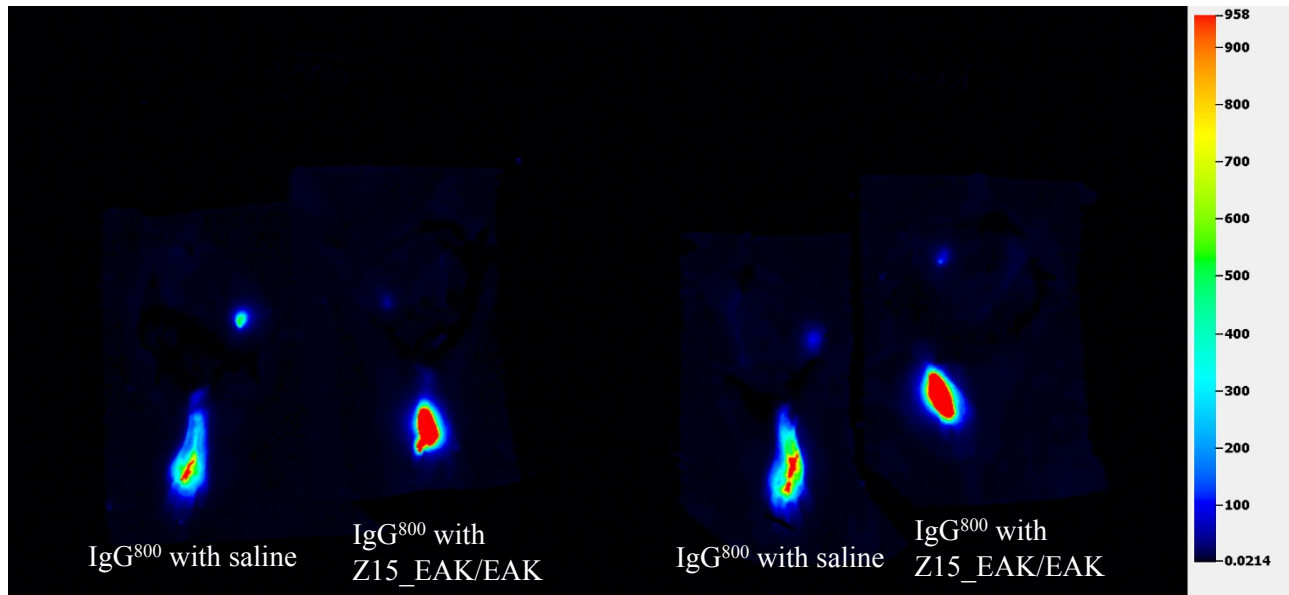

**Figure S1 caption:** Retention of IgG<sup>800</sup> in flank and peritoneal space. (a) flank subcutaneous injection comparing Rabbit anti-sheep IgG<sup>800</sup> formulated in saline or Z15\_EAK (n = 2) and EAK (n=2); (b) Intra-peritoneal injection of IgG<sup>800</sup> formulated with Z15\_EAK and EAK on day 4. Live images in the same experiment were obtained at the same threshold and resolution (255  $\mu$ m) settings and reported at the same color scale; (c) 6.5  $\mu$ g of the IgG were injected into footpads, with saline (n=2) on the right and Z15\_EAK/EAK gel (n=-2) on the left. The footpads were excised for *ex vivo* imaging using a Li-Cor Odyssey on day 3 with Z15\_EAK/EAK group showed advantage over saline control. The image was captured in the 800-channel at 169  $\mu$ m resolution, 3.2 mm focus offset.

## Figure S2

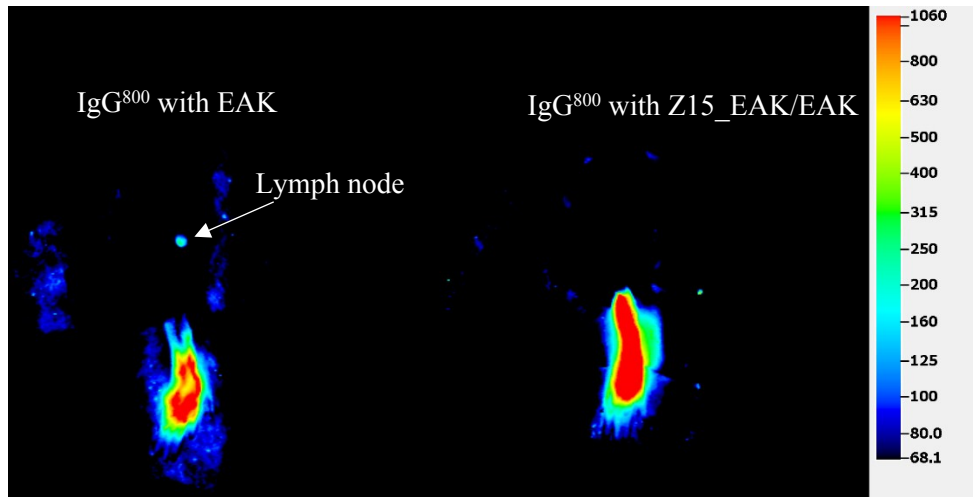

**Figure S2 caption:** *Ex vivo* end-point (day 28) images (Odyssey) of footpads injected with IgG<sup>800</sup> admixed with EAK or Z15\_EAK/EAK; images obtained in the 800-channel at 169  $\mu$ m resolution, 3.2 mm focus offset and quantified with Image Studio Lite software 5.2.

Figure S3a

AUC as a function of dose concentration

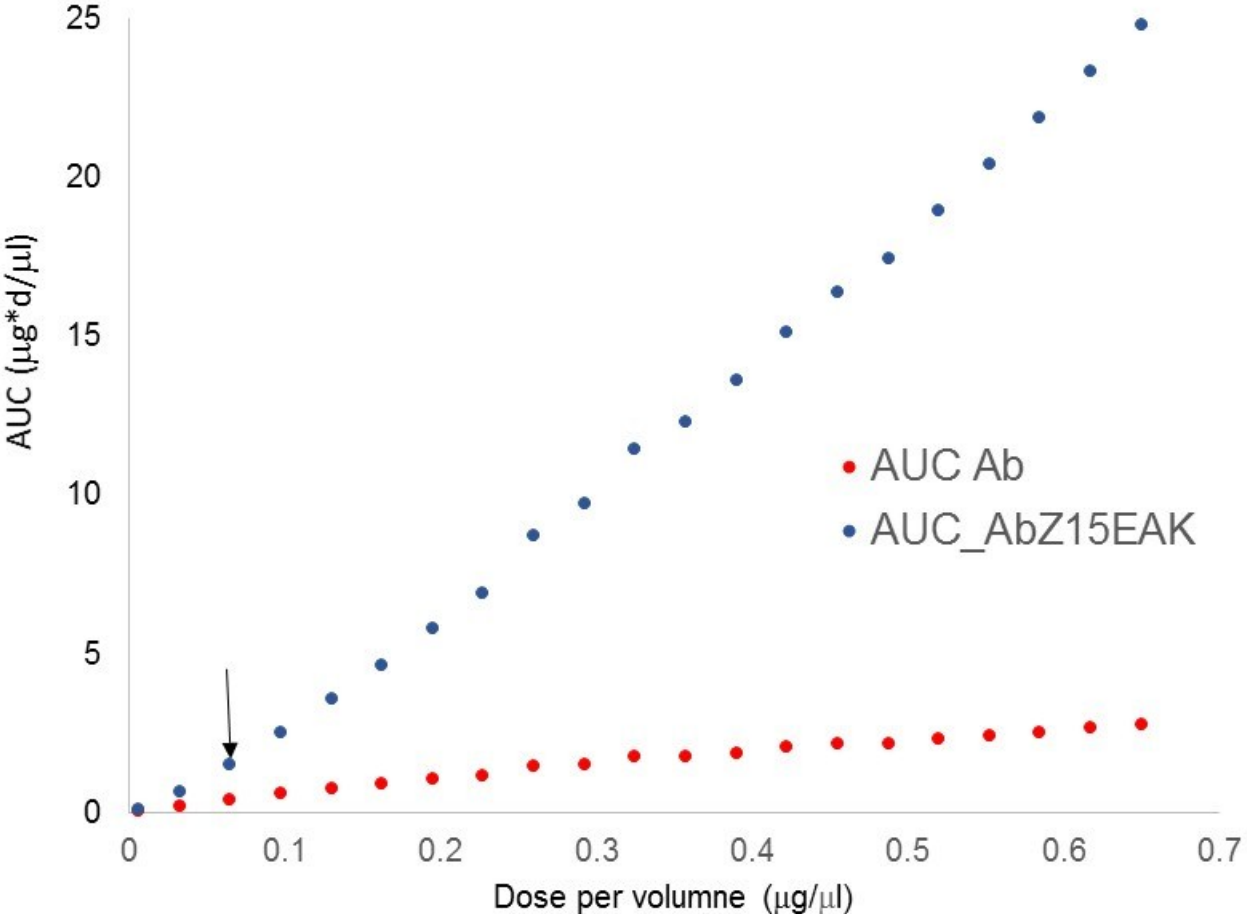

**Figure S3b**

Free Ab fraction relative to total dose injected

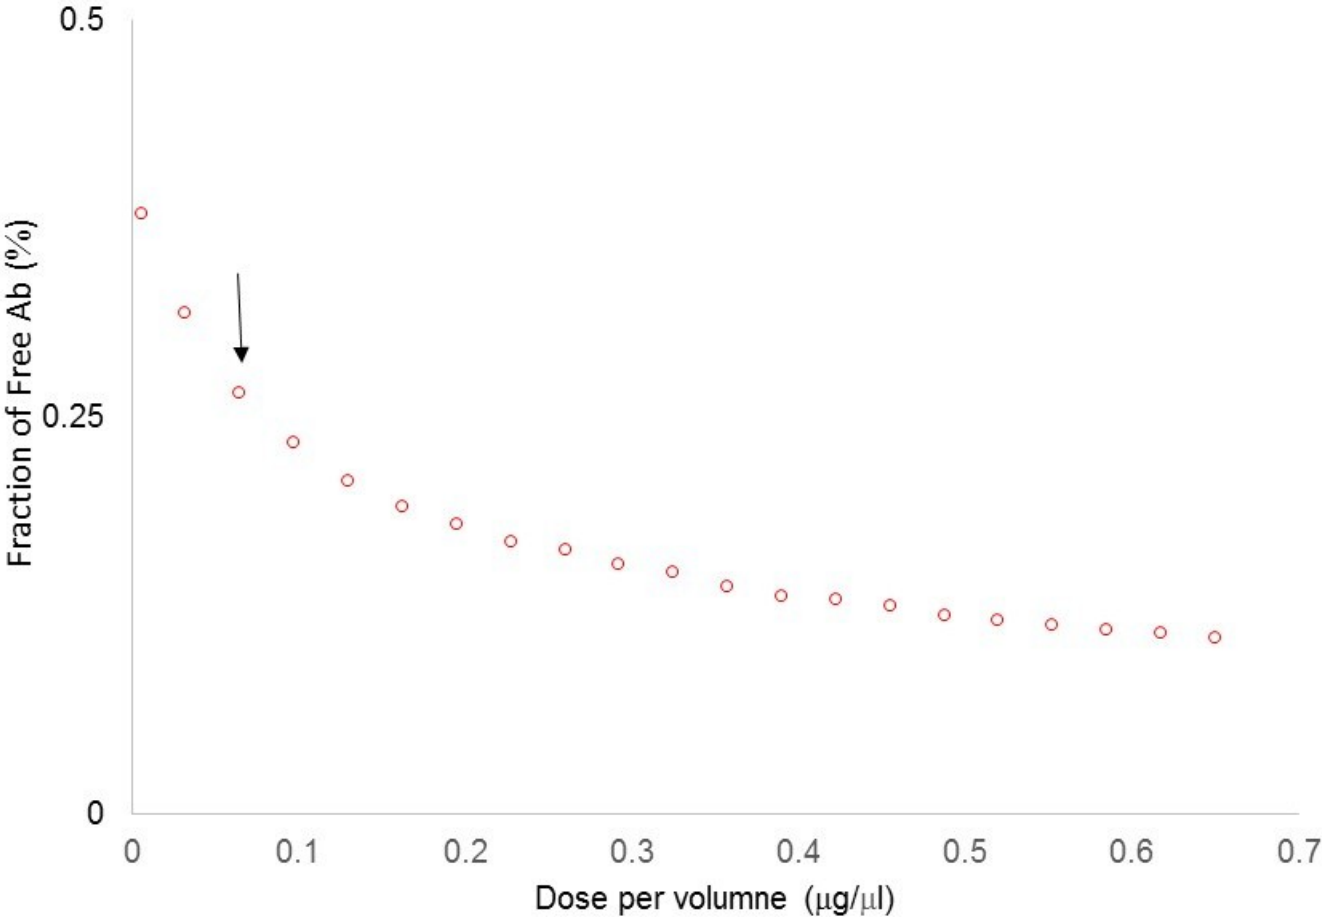

**Figure S3c**

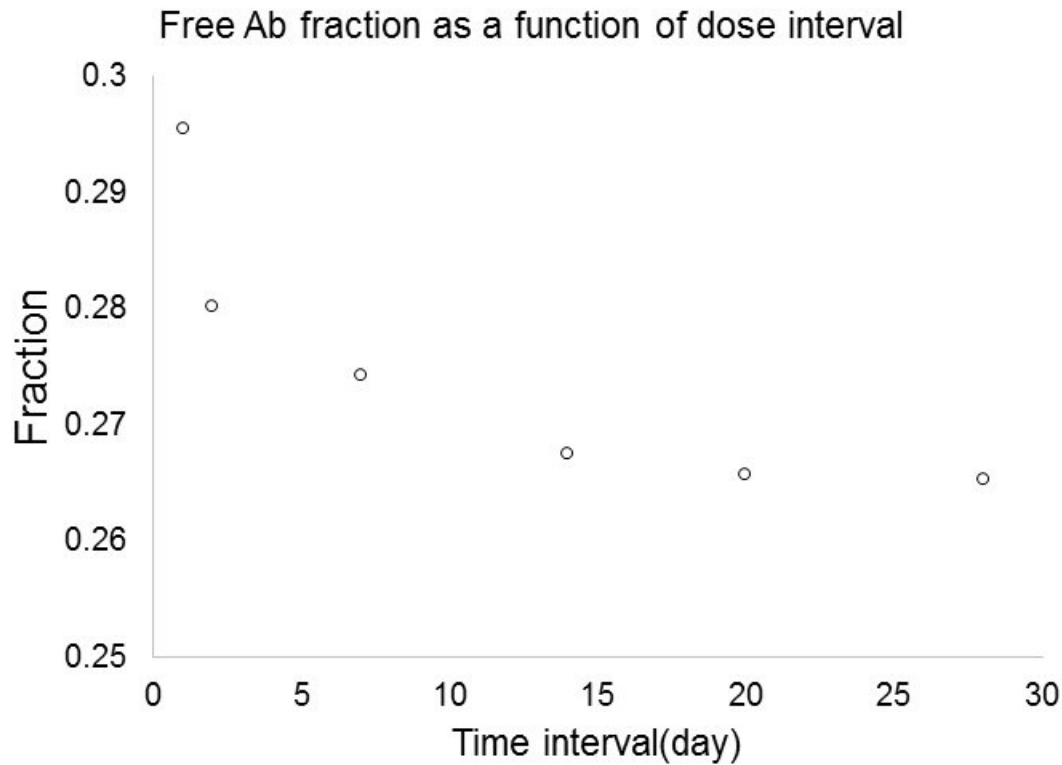

**Figure S3 caption:** Simulation of the impacts of dose and interval on free antibody fraction. Matlab Simbiology simulations were performed using kinetic parameters estimated from fitting *in vivo* footpad data into a one-compartmental model. Arrows indicate the *in vivo* dose of antibody (0.065  $\mu\text{g}/\mu\text{l}$ ) administered with the intact Z15\_EAK/EAK system. (a) AUC change with the varying dose of antibody ( $\pm 10$  times of 0.065  $\mu\text{g}/\mu\text{l}$ ). (b) AUC of free antibody and AUC of intact antibody and peptide coacervate were obtained from simulations. The free antibody fraction was then calculated by dividing AUC\_Ab by AUC\_AbZ15EAK. (c) Free antibody fraction when repeating the 0.65  $\mu\text{g}/\mu\text{l}$  dose one time at different time intervals.

**Figure S4**

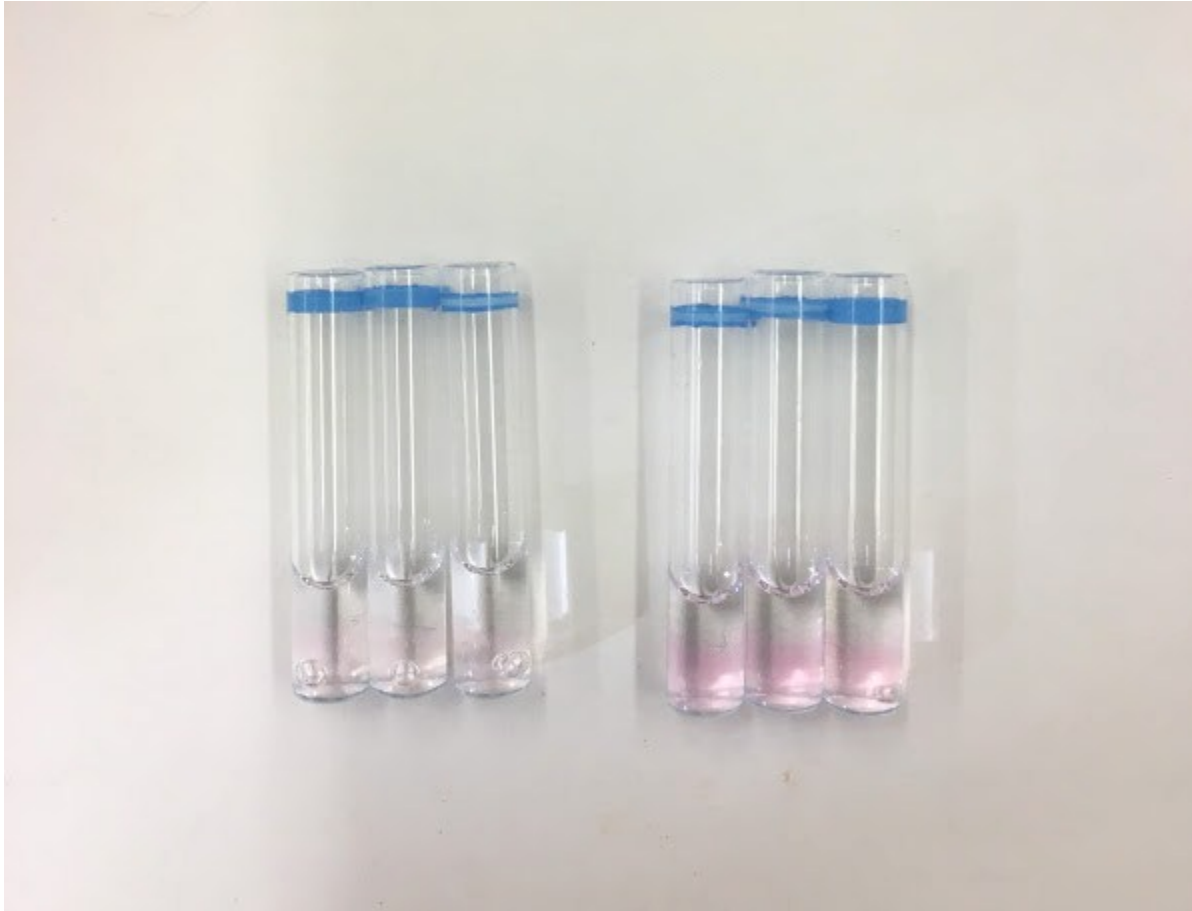

**Figure S4 caption:** A Cy3-labeled IgG was mixed with EAK (left 3 vessels) or Z15\_EAK/EAK (right 3) and incubated for 22 days at 37°C. The release medium at the top was replaced daily. The image showed retention of the antibody with the Z15\_EAK/EAK cocervate on day 22.
